# Supplementary material for: EHMT2 affects microglia polarization and aggravates neuronal damage and inflammatory response via regulating HMOX1
Source: publisher site journal article supplement (doi:10.1515/tnsci-2022-0276), 2023-01-01
Supplement: Supplementary file [file tnsci-2022-0276_sm.pdf]

# Supplementary material

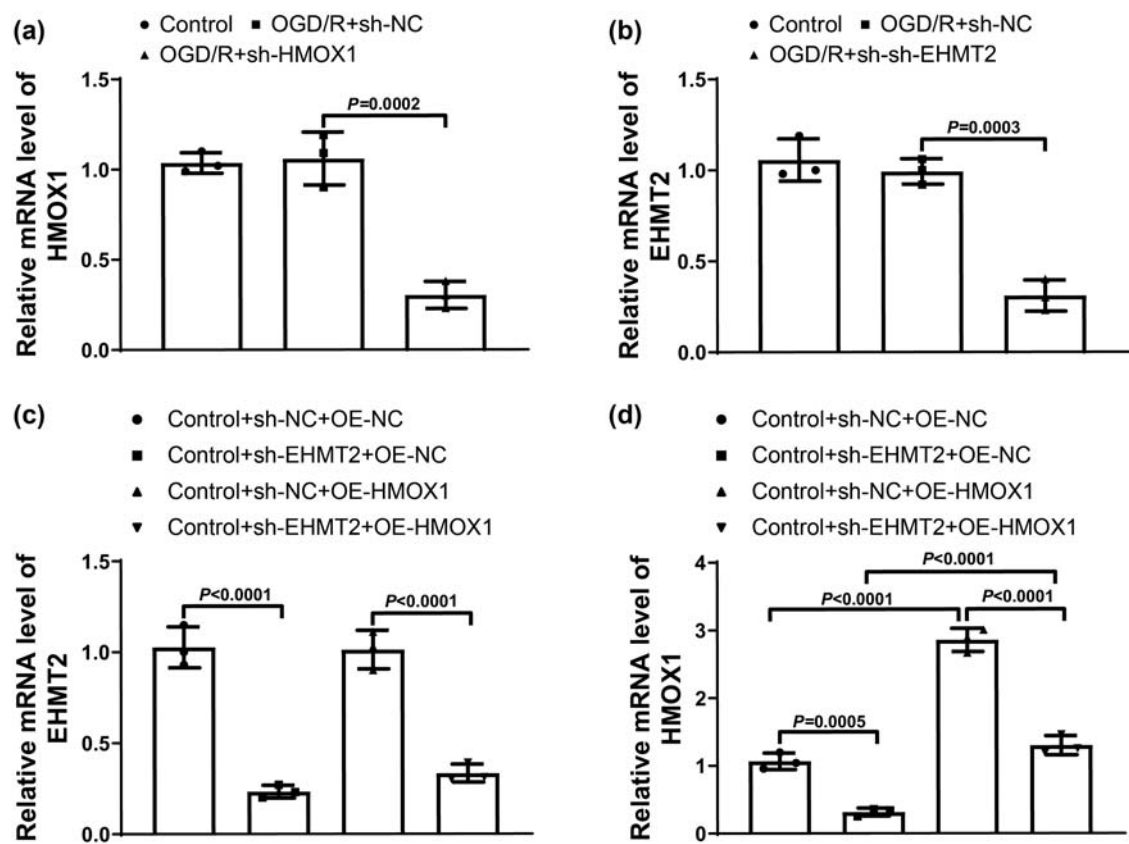

**Figure S1:** The verification of the transfection efficiency in Control group. Notes: (a to d), qRT-PCR was used to detect the mRNA expression of EHMT2 and HMOX1 in BV-2 cells. Each assay was repeated three times. One-way analysis of variance test was applied for comparisons among multiple groups with Tukey's multiple comparisons test for post hoc tests.
